# Supplementary material
Source: PubMed Central journal article supplement (PMC11009869)
Supplement: NIHMS1970498-supplement-Supinfo.pdf [file NIHMS1970498-supplement-Supinfo.pdf]

# Supplementary material: Progressively refined joint registration-segmentation (ProRSeg) of gastrointestinal organs at risk: Application to MRI and cone-beam CT

Jue Jiang<sup>1, †</sup>, Jun Hong<sup>1, \*</sup>, Kathryn Tringale<sup>2</sup>, Marsha Reyngold<sup>2</sup>, Christopher Crane<sup>2</sup>, Neelam Tyagi<sup>1</sup>, Harini Veeraraghavan<sup>1, †</sup>

<sup>1</sup> Department of Medical Physics, Memorial Sloan Kettering Cancer Center, 1250 First Ave, New York, NY 10065, USA

<sup>2</sup> Department of Radiation Oncology, Memorial Sloan Kettering Cancer Center, 1250 First Ave, New York, NY 10065, USA

<sup>†</sup> These authors contributed equally

<sup>\*</sup>: work performed when author was at MSKCC

**Supplementary Table 1.** Recurrent registration network (RRN) architecture used for registration. We use the following abbreviation for ease of presentation: N=number of features; K=Kernel size; S=Stride size; CLSTM=convolutional Long short-term memory; VecInc=diffeomorphic intergration layer.

| Layers | Registration net $G$        | Concatenation |
|--------|-----------------------------|---------------|
| 1      | CLSTM-(N16,K3,S2) LeakyReLu | 1             |
| 2      | CLSTM-(N16,K3,S2) LeakyReLu | 2             |
| 3      | CLSTM-(N16,K3,S2) LeakyReLu | 3             |
| 5      | CLSTM-(N16,K3,S2) LeakyReLu | 4             |
| 6      | CLSTM-(N16,K3,S1)           | -             |
| 7      | CONV-(N32,K3,S1) LeakyReLu  | 4             |
| 8      | CONV-(N32,K3,S1) LeakyReLu  | 3             |
| 9      | CONV-(N32,K3,S1) LeakyReLu  | 2             |
| 10     | CONV-(N32,K3,S1) LeakyReLu  | 1             |
| 11     | CONV-(N16,K3,S1) LeakyReLu  | -             |
| 12     | CONV-(N3,K3,S1) LeakyReLu   | -             |
| 13     | VecInC                      | -             |

@articliang2020auto, title=Auto-segmentation of pancreatic tumor in multi-parametric MRI using deep convolutional neural networks, author=Liang, Ying and Schott, Diane and Zhang, Ying and Wang, Zhiwu and Nasief, Haidy and Paulson, Eric and Hall, William and Knechtges, Paul and Erickson, Beth and Li, X Allen, journal=Radiotherapy and Oncology, volume=145, pages=193–200, year=2020, publisher=Elsevier

**Supplementary Table 2.** RSN architecture used for segmentation. We use the following abbreviation for ease of presentation: N=number of features; K=Kernel size; S=Stride size;CLSTM=convolutional Long short-term memory;

| Layers | Unet                     | Concatenation |
|--------|--------------------------|---------------|
| 1      | CONV-(N32,K3,S1), ReLu   | -             |
| 2      | CLSTM-(N32,K3,S1), ReLu  | 1             |
| 3      | Max-Pooling (S2)         | -             |
| 4      | CONV-(N64,K3,S1), ReLu   | -             |
| 5      | CLSTM-(N64,K3,S1), ReLu  | 2             |
| 6      | Max-Pooling (S2)         | -             |
| 7      | CONV-(N128,K3,S1), ReLu  | -             |
| 8      | CLSTM-(N128,K3,S1), ReLu | 3             |
| 9      | Max-Pooling (S2)         | -             |
| 10     | CONV-(N256,K3,S1), ReLu  | -             |
| 11     | CLSTM-(N256,K3,S1), ReLu | 4             |
| 12     | Max-Pooling (S2)         | -             |
| 13     | CONV-(N512,K3,S1), ReLu  | -             |
| 14     | CLSTM-(N512,K3,S1), ReLu | -             |
| 15     | UP-Pooling (S2)          | 4             |
| 16     | CONV-(256,K3,S1), ReLu   | -             |
| 17     | CONV-(N256,K3,S1), ReLu  | -             |
| 18     | UP-Pooling (S2)          | 3             |
| 19     | CONV-(N128,K3,S1), ReLu  | -             |
| 20     | CONV-(N128,K3,S1), ReLu  | -             |
| 21     | UP-Pooling (S2)          | 2             |
| 22     | CONV-(N64,K3,S1), ReLu   | -             |
| 23     | CONV-(N64,K3,S1), ReLu   | -             |
| 24     | UP-Pooling (S2)          | 1             |
| 25     | CONV-(N32,K3,S1), ReLu   | -             |
| 26     | CONV-(N2,K1,S1), Softmax | -             |

**Supplementary Table 3.** P-values measuring differences in segmentation accuracy produced by analyzed methods with respect to ProRSeg. DSC metric was used for comparison using two-sided, paired Wilcoxon signed rank test at 95% significance level. LG bowel: Large bowel, SM bowel: small bowel, Sto-Duo: stomach-duodenum. †

| Method   | DSC      |          |          |          | HD95     |          |          |          |
|----------|----------|----------|----------|----------|----------|----------|----------|----------|
|          | Liver    | LG Bowel | SM Bowel | Sto-Duo  | Liver    | LG Bowel | SM Bowel | Sto-Duo  |
| SyN      | 8.10E-10 | 8.10E-10 | 1.10E-07 | 2.10E-08 | 3.60E-05 | 1.80E-07 | 4.40E-09 | 6.10E-06 |
| Voxmorph | 1.20E-04 | 9.00E-08 | 7.40E-07 | 7.00E-09 | 3.30E-05 | 8.70E-10 | 3.90E-07 | 3.90E-05 |
| Unet3D   | 4.40E-07 | 0.00018  | 4.50E-08 | 3.50E-08 | 1.80E-05 | 8.70E-09 | 1.80E-06 | 1.40E-05 |
| nnUnet   | 0.006323 | 0.00118  | 0.00017  | 4.90E-08 | 4.90E-05 | 9.80E-06 | 0.00019  | 9.30E-06 |
| UResNet  | 0.00012  | 9.00E-08 | 7.40E-07 | 0.00123  | 0.00798  | 2.90E-08 | 2.70E-05 | 3.90E-05 |

**Supplementary Table 4.** Organ-specific coefficient of variation computed using DSC metric ( $CV_{DSC}$  per patient.  $CV_{DSC}$  was computed using the ratio of mean DSC to standard deviation of DSC was computed per patient based on all possible MR-MR combinations from the different treatment fractions to evaluate variability due to anatomic prior.

| Method | $CV_{DSC} \%$ |          |          |         | $CV_{DSC}^{Mean} \%$ |
|--------|---------------|----------|----------|---------|----------------------|
|        | Liver         | LG Bowel | SM Bowel | Sto-Duo |                      |
| P1     | 0.137         | 0.977    | 5.36     | 1.29    | 1.94                 |
| P2     | 0.681         | 0.885    | 2.39     | 0.654   | 1.15                 |
| P3     | 2.10          | 1.82     | 4.60     | 2.81    | 2.83                 |
| P4     | 0.425         | 0.165    | 0.719    | 6.89    | 2.05                 |
| P5     | 0.277         | 9.79     | 5.33     | 11.02   | 6.60                 |
| P6     | 0.164         | 2.65     | 3.89     | 3.05    | 2.44                 |
| P7     | 0.526         | 5.03     | 5.05     | 6.59    | 4.29                 |
| P8     | 0.669         | 0.524    | 6.54     | 5.03    | 3.19                 |
| P9     | 0.452         | 0.238    | 4.49     | 2.69    | 1.97                 |
| P10    | 0.452         | 2.66     | 3.73     | 7.49    | 3.58                 |

**Supplementary Table 5.** Mean displacement measured in all three directions using SyN, Voxelmorph, and ProRSeg of the individual organs. Stomach-Duo: Stomach duodenum

| Metric   | Liver (mm) |      |      | Large bowel (mm) |      |      | Small bowel (mm) |      |      | Stomach-Duo (mm) |      |      |
|----------|------------|------|------|------------------|------|------|------------------|------|------|------------------|------|------|
|          | x          | y    | z    | x                | y    | z    | x                | y    | z    | x                | y    | z    |
| SyN      | 0.12       | 0.13 | 0.17 | 0.12             | 0.17 | 0.25 | 0.15             | 0.12 | 0.15 | 0.11             | 0.11 | 0.16 |
| Voxmorph | 0.91       | 0.80 | 1.10 | 0.91             | 0.89 | 1.14 | 0.76             | 0.83 | 0.97 | 0.75             | 0.74 | 0.85 |
| ProRSeg  | 2.60       | 2.71 | 1.88 | 2.60             | 3.33 | 3.81 | 4.92             | 3.21 | 4.06 | 3.54             | 2.95 | 3.48 |

**Supplementary Table 6.** Accumulated dose and toxicity for analyzed subset of 5 patients

| Metric | Stomach-Duo          |                  | Small bowel          |                  | Large Bowel          |                  | Acute toxicity         | Late toxicity          |
|--------|----------------------|------------------|----------------------|------------------|----------------------|------------------|------------------------|------------------------|
|        | 0.035cm <sup>3</sup> | 5cm <sup>3</sup> | 0.035cm <sup>3</sup> | 5cm <sup>3</sup> | 0.035cm <sup>3</sup> | 5cm <sup>3</sup> |                        |                        |
| P1     | 32.92                | 22.79            | 33.74                | 22.39            | 24.70                | 20.26            | -                      | -                      |
| P2     | 41.33                | 28.93            | 29.14                | 20.90            | 27.03                | 22.00            | Grade I abdominal pain | Grade I abdominal pain |
| P3     | 33.03                | 24.41            | 40.38                | 31.07            | 17.41                | 15.07            | -                      | -                      |
| P4     | 40.23                | 27.82            | 34.39                | 21.06            | 23.76                | 19.50            | -                      | -                      |
| P5     | 26.04                | 20.89            | 25.45                | 21.41            | 26.14                | 20.48            | -                      | -                      |

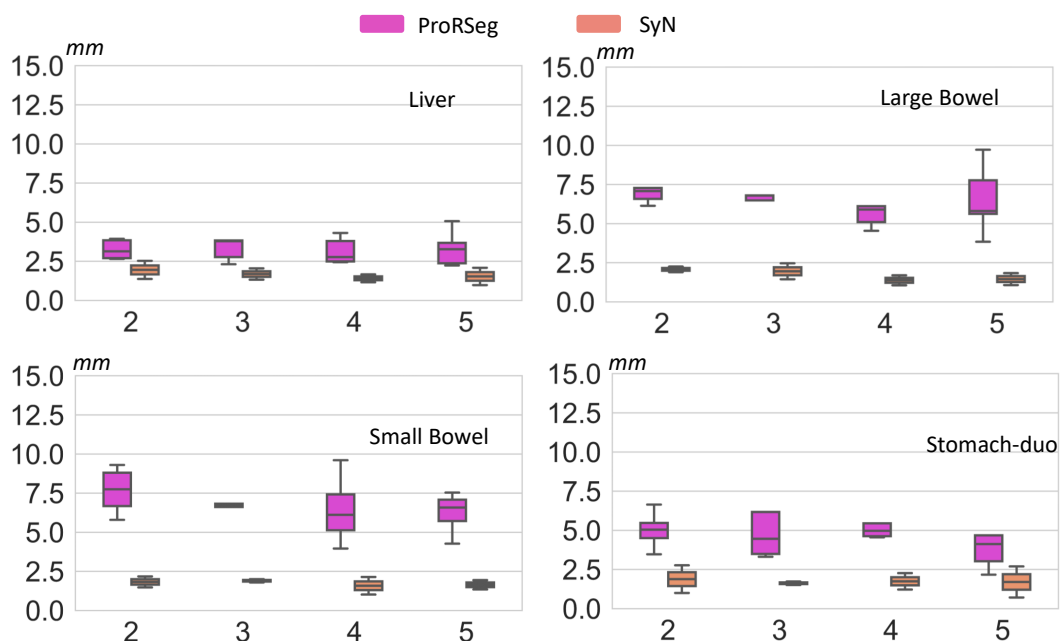

**Supplementary Figure 1.** Mean displacement computed for each organ at different treatment fractions shown for ProRSeg and SyN methods.

**Supplementary Table 7.** Significance test results comparing ProRSeg++ with other baseline methods with Bonferroni correction.

| Method     | DSC        |          |          |         | HD95 mm |          |          |         |
|------------|------------|----------|----------|---------|---------|----------|----------|---------|
|            | Liver      | LG Bowel | SM Bowel | Sto-Duo | Liver   | LG Bowel | SM Bowel | Sto-Duo |
| SyN        | 0.0004     | 0.01     | 0.0030   | 0.045   | 0.048   | 0.12     | 0.028    | 0.45    |
| Voxelmorph | 0.0003     | 0.012    | 0.014    | 0.024   | 0.085   | 0.004    | 0.183    | 0.45    |
| Unet3D     | 0.0002     | 0.044    | 0.018    | 0.0001  | 0.075   | 0.012    | 0.015    | 4e-4    |
| nnUnet     | 0.0011     | 0.044    | 0.014    | 0.024   | 0.060   | 0.086    | 0.016    | 0.032   |
| UResNet    | 0.00000001 | 0.010    | 0.0046   | 1e-4    | 0.075   | 0.12     | 0.018    | 0.3     |

**Supplementary Table 8.** Significance test results comparing ProRSeg with other baseline methods with Bonferroni correction on CBCT dataset.

| Method     | DSC      |          | HD95 mm  |          |
|------------|----------|----------|----------|----------|
|            | LG Bowel | SM Bowel | LG Bowel | SM Bowel |
| SyN        | 5.80E-10 | 1.90E-07 | 2.80E-05 | 1.00E-06 |
| Voxelmorph | 4.40E-07 | 7.60E-05 | 1.89E-02 | 0.03116  |
| nnUnet     | 5.10E-13 | 2.00E-10 | 7.90E-12 | 4.10E-11 |
| UResNet    | 1.20E-06 | 8.70E-04 | 1.42E-01 | 1.85E-01 |
