# Supplementary material
Source: PubMed Central journal article supplement (PMC11009869)

ProRSeg

SyN

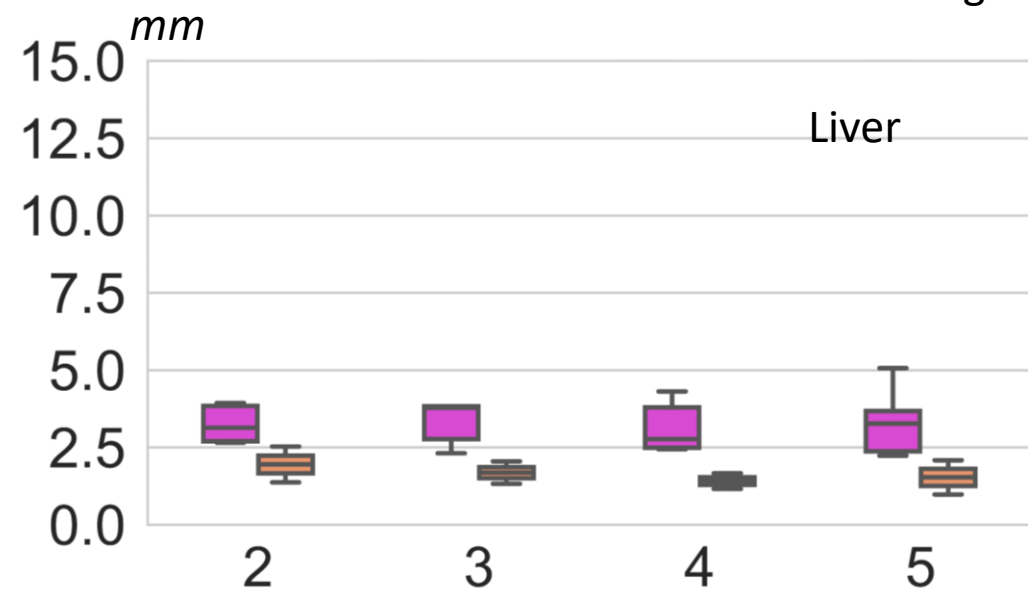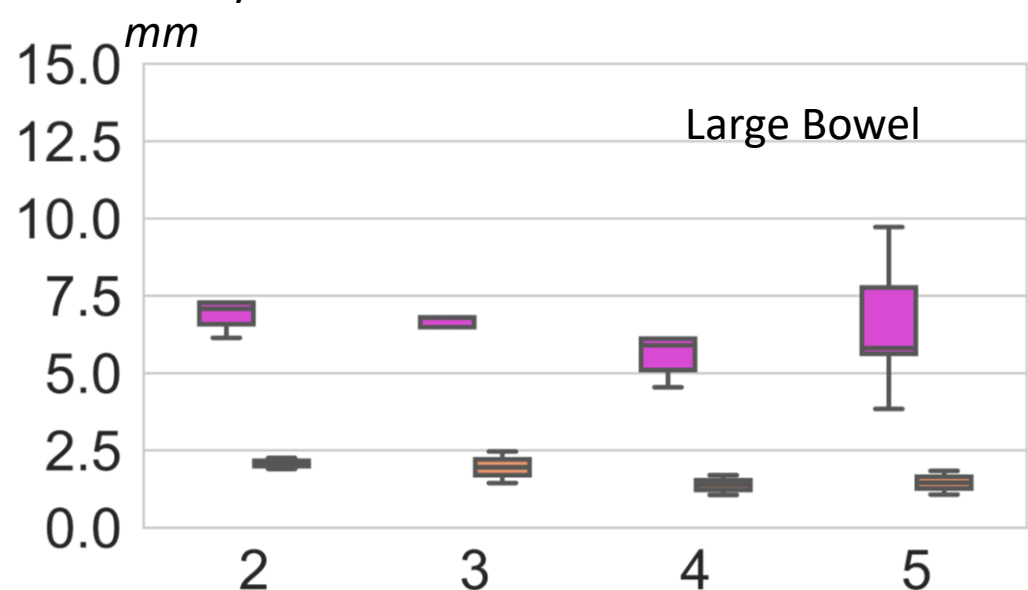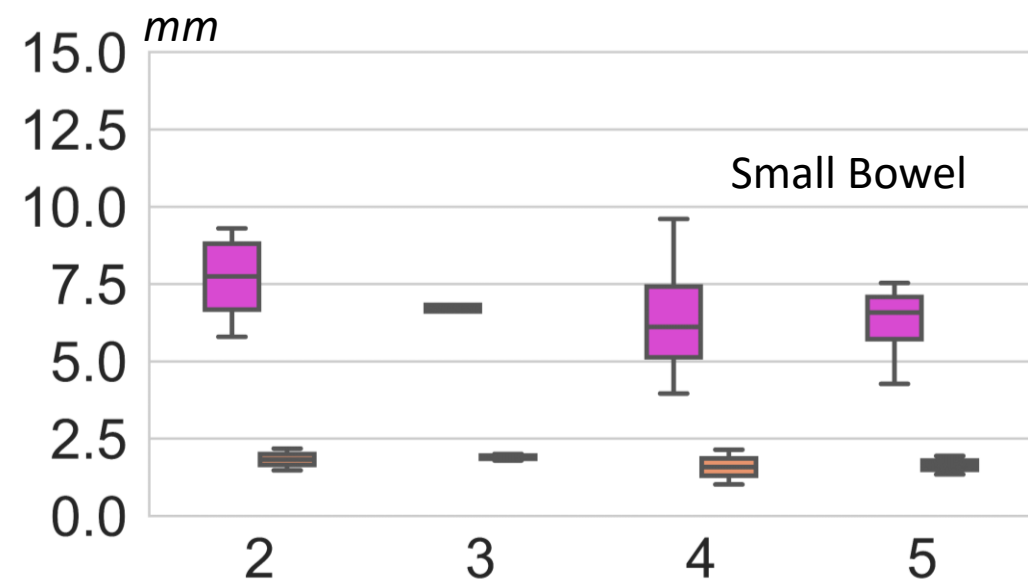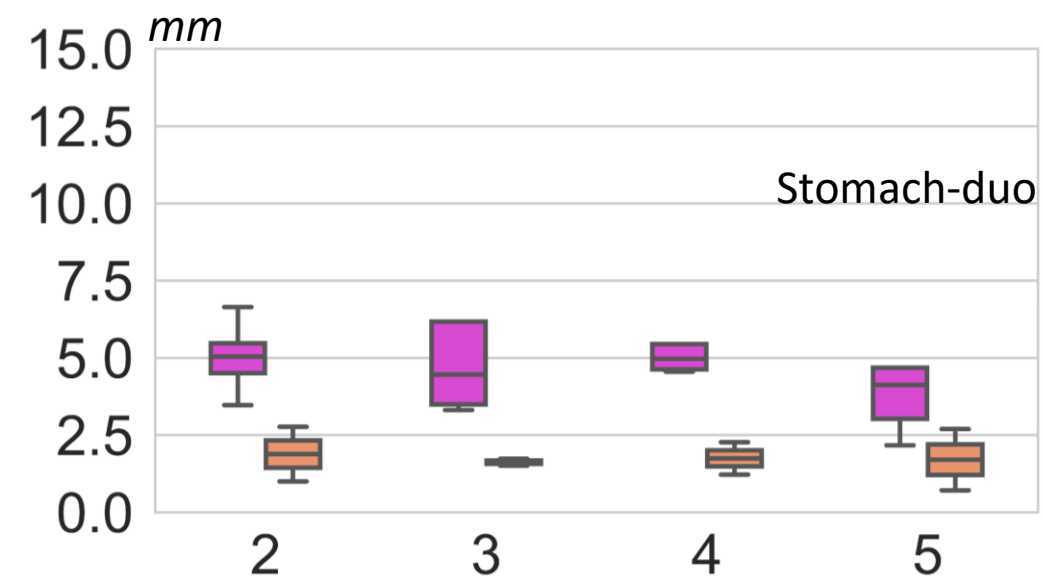

Supplement: NIHMS1970498-supplement-Fig_S1.pdf [file NIHMS1970498-supplement-Fig_S1.pdf]
